# Supplementary material
Source: HighWire-hosted journal article supplement (https://tech.snmjournals.org/highwire/filestream/9825/field_highwire_adjunct_files/0/261289_Supplemental_Data.pdf)

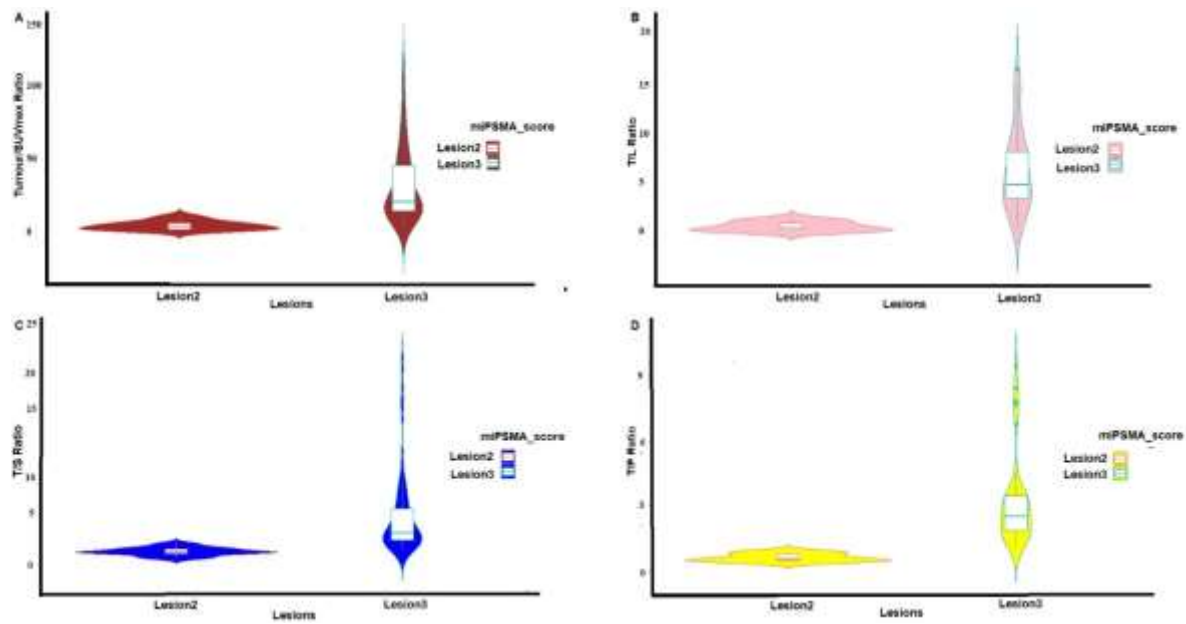

Color version of Figure 3.

Supplement: 261289_Supplemental_Data.pdf [file 261289_Supplemental_Data.pdf]
